# Supplementary material for: Generation of a miniature pig disease model for human Laron syndrome
Source: PubMed Central journal article supplement (PMC4625145; doi:10.1038/srep15603), 2015-10-29
Supplement: srep15603-s1.pdf [file srep15603-s1.pdf]

# **Generation of a miniature pig disease model for human Laron syndrome**

Dan Cui, Fang Li, Qiuyan Li, Jia Li, Yaofeng Zhao, Xiaoxiang Hu, Ran Zhang<sup>\*</sup>,  
Ning Li<sup>\*</sup>

State Key Laboratory for Agrobiotechnology, China Agricultural University, Beijing  
100193, China

**Corresponding author:** Ning Li and Ran Zhang

State Key Laboratory for Agrobiotechnology, China Agricultural University, Beijing  
100193, China

Tel: +86 10 6273 3323; Fax: +86 10 6273 3904

<sup>\*</sup>E-mail: [ninglcau@cau.edu.cn](mailto:ninglcau@cau.edu.cn); [zhangran0628@cau.edu.cn](mailto:zhangran0628@cau.edu.cn)

## **Supplementary Materials**

Supplementary Figure S1. Identification of F0 heterozygous pigs

Supplementary Figure S2. Identification of F1  $GHR^{+/4bp}$  pigs by T7E1 cleavage

Supplementary Figure S3. Identification of *GHR* mRNA expression in the liver tissues of F2 pigs

Supplementary Figure S4. GHBP levels in the F2 generation

Supplementary Figure S5. Reduced bone growth in  $-/-$  pigs

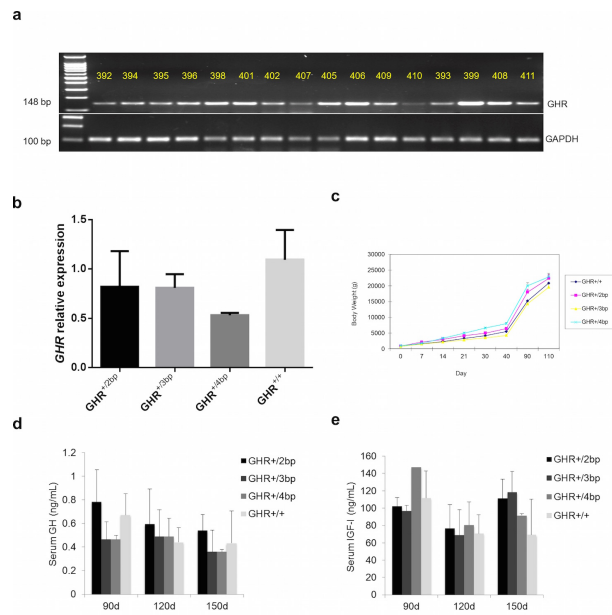

**Supplementary Figure S1 | Identification of F0 heterozygous pigs.** Detection and quantification of *GHR* mRNA expression in F0 pigs by RT-PCR (a) and qRT-PCR (b). Numbers indicate individual F0 pigs;  $GHR^{+/4bp}$ ,  $GHR^{+/2bp}$ ,  $GHR^{+/3bp}$  are the different genotypes in the F0 heterozygous pigs. The expression levels were determined by the expression relative to *GAPDH* (an internal control). The data were combined from three independent experiments; the bars represent the means  $\pm$  SD. (c) No significant difference in body weight was seen between F0 heterozygous pigs and wild-type controls. Neither a significantly increased level of GH (d) nor a significantly reduced level of IGF-I (e) was observed in F0 heterozygous pigs compared with the wild-type controls. The bars represent the means  $\pm$  SD.

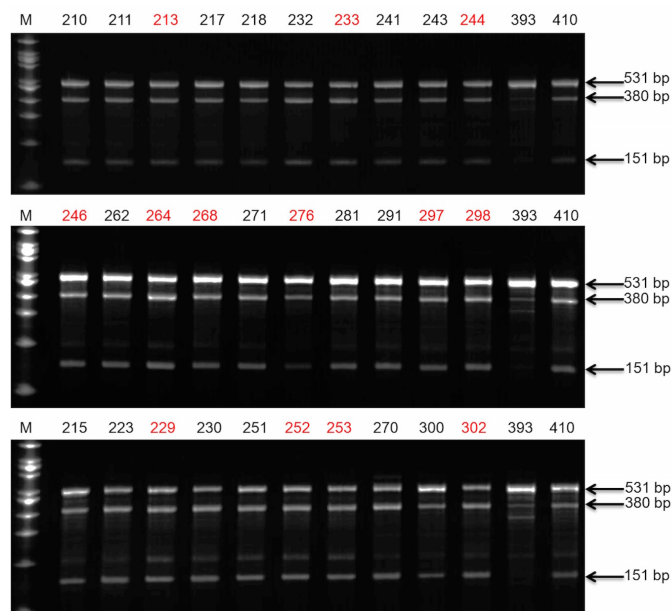

## Supplementary Figure S2 | Identification of F1 $GHR^{+4bp}$ pigs by T7E1 cleavage.

The products after cleavage were separated on 2.5% agarose; the expected sizes are 380 bp and 151 bp after T7E1 cleavage; all the numbers represent the positive  $GHR^{+4bp}$  pigs in the F1 generation; red numbers indicate the female  $GHR^{+4bp}$  pigs.

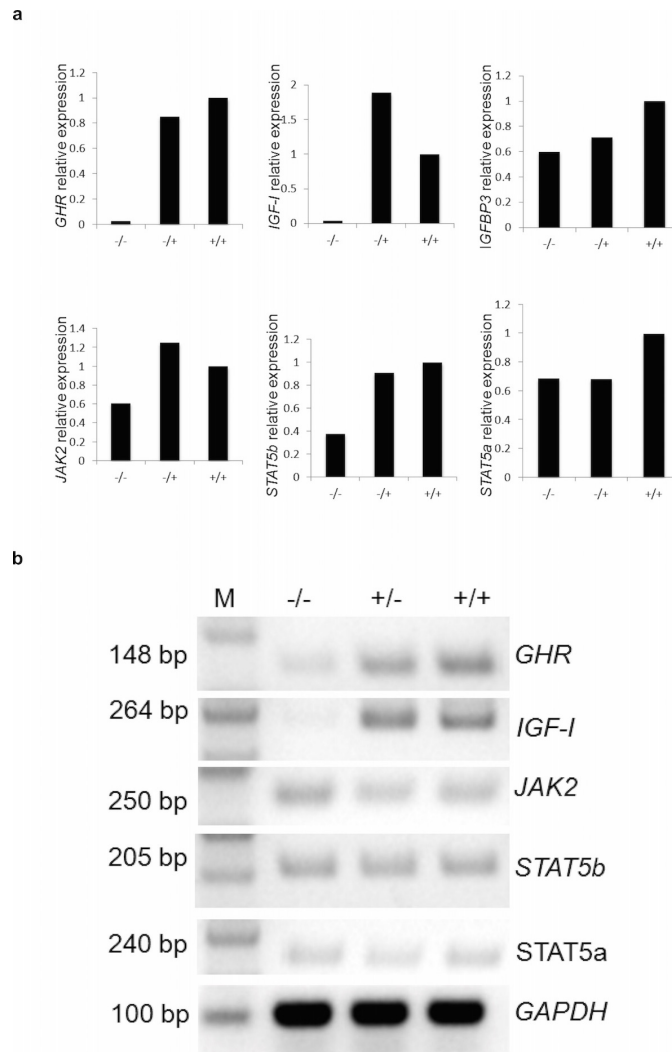

## Supplementary Figure S3 | Identification of *GHR* mRNA expression in the liver

tissues of F2 pigs. (a) Quantification of *GHR*, *IGF-I*, *IGFBP3*, *JAK2*, *STAT5b* and *STAT5a* mRNA expression in the liver tissues of F2 pigs by qRT-PCR. The expression levels were determined by the expression relative to *GAPDH* (an internal control); the data were combined from three independent experiments, with one pig

per group. (b) RT-PCR results of the liver expression of *GHR*, *IGF-I*, *IGFBP3*, *JAK2*, *STAT5b* and *STAT5a*.

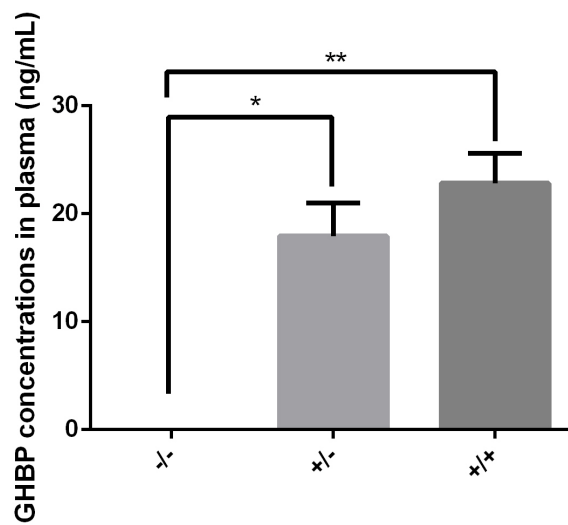

**Supplementary Figure S4 | GHBP levels in the F2 generation.** The five-month-old -/- pigs showed an absence of GHBP in plasma. The -/-, +/- ( $GHR^{+/4bp}$ ) and +/+ ( $GHR^{+/+}$ ) represent different genotypes in the F2 generation; the bars represent the means  $\pm$  SD (at least three pigs per group); \*\* $P < 0.01$ , \* $P < 0.05$ .

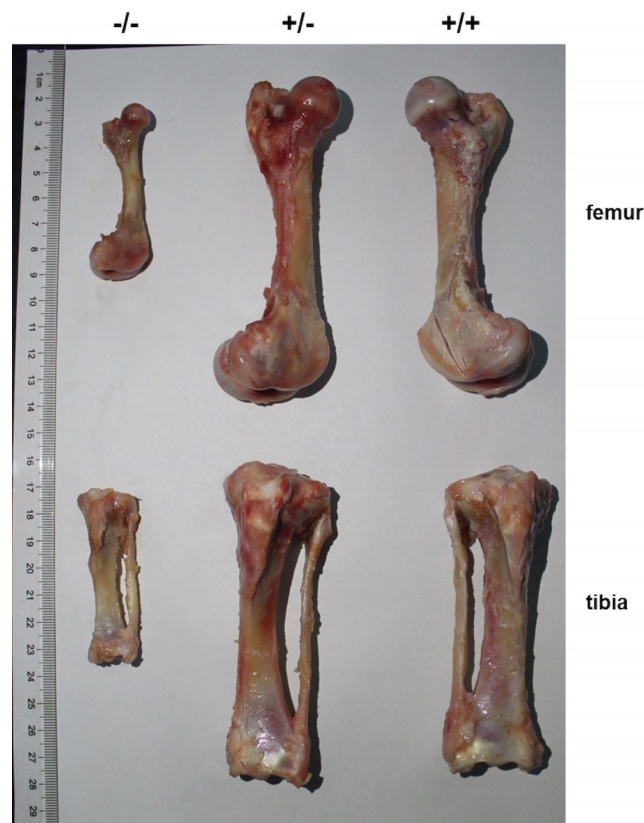

**Supplementary Figure S5 | Reduced bone growth in the -/- pigs.** The femur and tibia from three-and-half-month-old pigs are shown; the -/-, +/- ( $GHR^{+4bp}$ ) and +/+ ( $GHR^{+/+}$ ) represent different genotypes in the F2 generation; with one pig per group.
